# Supplementary material
Source: PubMed Central journal article supplement (PMC6079368)
Supplement: mmc1.pdf [file mmc1.pdf]

**Supplemental Information**

***In Vivo* Expansion and Antitumor Activity  
of Coinfused CD28- and 4-1BB-Engineered  
CAR-T Cells in Patients with B Cell Leukemia**

**Zhi Cheng, Runhong Wei, Qiuling Ma, Lin Shi, Feng He, Zixiao Shi, Tao Jin, Ronglin Xie, Baofeng Wei, Jing Chen, Hongliang Fang, Xiaolu Han, Jennifer A. Rohrs, Paul Bryson, Yarong Liu, Qi-Jing Li, Bo Zhu, and Pin Wang**

**Supplementary table 1: Information on patients' prior treatment history, preconditioning regimen, and time for CAR-T production**

| Patient | Prior therapies                                                                                                                                                                                                                                                                                                                                                                                                                                                                                                                                                                                                                | Pre-conditioning                      | CAR-T production time (days) |       |
|---------|--------------------------------------------------------------------------------------------------------------------------------------------------------------------------------------------------------------------------------------------------------------------------------------------------------------------------------------------------------------------------------------------------------------------------------------------------------------------------------------------------------------------------------------------------------------------------------------------------------------------------------|---------------------------------------|------------------------------|-------|
|         |                                                                                                                                                                                                                                                                                                                                                                                                                                                                                                                                                                                                                                |                                       | CD28                         | 4-1BB |
| 1       | (1) 11/2011-03/2012: VDLDEXCAT and HD-MTX+6MP, 6 cycles, CR;<br>(2) 05/2012: relapse;<br>(3) 05/2012: multiple therapies (VDLDEX, CAT, HD-MTX+6MP, CAM, VDLDEX, CAT, COAP, CA, VDLP and CAM), SD;<br>(4) 11/2015: CNS relapse                                                                                                                                                                                                                                                                                                                                                                                                  | CTX 300mg D-4;<br>Flu 25mg D-4 to D-2 | 9                            | 9     |
| 2       | (1) 03/2014-05/2014: CHOP, 6 cycles, CR;<br>(2) 02/2016: relapse;<br>(3) 02/2016: ECHOP, 1 cycle, SD                                                                                                                                                                                                                                                                                                                                                                                                                                                                                                                           | CTX 500mg D-4;<br>Flu 45mg D-4 to D-2 | 10                           | 10    |
| 3       | (1) 09/2013-03/2014: VDP, 4 cycles, CR;<br>(2) 03/2014: allo-HSCT, CR;<br>(3) 03/2016/03: relapse                                                                                                                                                                                                                                                                                                                                                                                                                                                                                                                              | CTX 400mg D-4;<br>Flu 40mg D-4 to D-2 | 10                           | 10    |
| 4       | (1) 04/2012: VDLP, VDCP, 5 cycles, CR;<br>(2) 11/2014: CNS relapse;<br>(3) 11/2014: Intrathecal chemotherapy, 3 cycles, CR;<br>(4) 06/2015: relapse;<br>(5) 06/2015-02/2016: VDCLP + Intrathecal chemotherapy, CR;<br>(6) 03/2016: relapse                                                                                                                                                                                                                                                                                                                                                                                     | CTX 500mg D-4;<br>Flu 50mg D-4 to D-2 | 9                            | 9     |
| 5       | (1) 03/2014: VDLP, CR;<br>(2) 05/2014-01/2016: VDCP, HD-MT, EOACP, VDCLP, EAOCP, sequential chemotherapy, CR;<br>(3) 03/2016: relapse;<br>(4) 03/2016: EOACP, PD                                                                                                                                                                                                                                                                                                                                                                                                                                                               | None                                  | 6                            | 6     |
| 6       | (1) 12/2015-01/2016: VDCP, 1 cycle, CAM, 1 cycle, CR;<br>(2) 03/2016: relapse;<br>(3) 03/2016: VDPC, PD;<br>(4) 05/2016: CNS relapse                                                                                                                                                                                                                                                                                                                                                                                                                                                                                           | CTX 500mg D-4;<br>Flu 50mg D-4 to D-2 | 6                            | 6     |
| 7       | (1) 08/2014-12/2014: CODP, 1 cycle, CODP, CODP+L, COMP, 3 cycles, CR;<br>(2) 01/2015: relapse;<br>(3) 01/2015: MTX-3g, 1 cycle, blast cell 3.5%;<br>(4) 03/2015: CODP, 1 cycle, blast cell 4.5%;<br>(5) 04/2015: Medium dose cytarabine, 1 cycle, blast cell 1.5%;<br>(6) 06/2015: COMP, 1 cycle, blast cell 3%;<br>(7) 08/2015: MTX-3g, 1 cycle, blast cell 2.5%;<br>(8) 11/2015: CODP+L, 1 cycle, blast cell 4%;<br>(9) 01/2016: Medium dose cytarabine, 1 cycle, Intrathecal chemotherapy, 12cycle;<br>(10) 04/2016: relapse, testicular leukemia;<br>(11) 05/2016: ID-Ara-C, 1 cycle, orchiectomy;<br>(12) 2016/06 relapse | CTX 500mg D-4;<br>Flu 50mg D-4 to D-2 | 7                            | 7     |
